# Supplementary material
Source: PubMed Central journal article supplement (PMC4521046)
Supplement: supp_M115.648709_jbc.M115.648709-1.pdf [file supp_M115.648709_jbc.M115.648709-1.pdf]

## Supplemental Table 1. List of Primers.

| Primer                              | Sequence                                                                                                  |                  |
|-------------------------------------|-----------------------------------------------------------------------------------------------------------|------------------|
| Primers for Gram-negative deletions | ( <b>Boldface</b> characters indicate the 20 nucleotides homologous to the FRT-PGK-gb2-neo-FRT cassette.) | deletion         |
| Ecoli-pgaA-del5F                    | CTGTAATTAGATATAGAGAGAGATTTTGGCAATACATGGAGTAAT<br>ACAGGA <b>ATTAACCCTCACTAAAGGGCGG</b>                     | <i>pgaA</i>      |
| Ecoli-pgaA-del3R                    | ACTCACCAGCATCAGGATATATTTATTTCCATTACGTAACATATTT<br>ATCCTA <b>ATACGACTCACTATAGGGCTC</b>                     | <i>pgaA</i>      |
| Ecoli-pgaB-del5F                    | CACAACCTTATACGTTGAATTCGATATGACATTCAGATTTTAAGGAT<br>AAATA <b>ATTAACCCTCACTAAAGGGCGG</b>                    | <i>pgaB</i>      |
| Ecoli-pgaB-del3R                    | ATGCATAACACCAGACATAATATAAAAAACGATACGATGCGATTAA<br>TCATTA <b>ATACGACTCACTATAGGGCTC</b>                     | <i>pgaB</i>      |
| Ecoli-pgaC-del5F                    | CCAGTAAACGTAAGTGGTGTGCGGGTCGTAATAATTAATTTGTT<br>CATAA <b>ATTAACCCTCACTAAAGGGCGG</b>                       | <i>pgaC</i>      |
| Ecoli-pgaC-del3R                    | ACCTTATTCGTCCTGAGTTTTCAACAGCCTGGTATCCGAAAAATGA<br>TTAATA <b>ATACGACTCACTATAGGGCTC</b>                     | <i>pgaC</i>      |
| Ecoli-pgaD-del5F                    | GCAACGCGCCCGTTGGGTAAGTCCCAGATCGCGGGATTCTGAGAGGT<br>TAATA <b>ATTAACCCTCACTAAAGGGCGG</b>                    | <i>pgaD</i>      |
| Ecoli-pgaD-del3R                    | AGTGTATTATCGGGCAGAGCCCAGGCGAACCAGGGCTTTGTTTTGG<br>GTGT <b>TAATACGACTCACTATAGGGCTC</b>                     | <i>pgaD</i>      |
| Kp-pgaC-del5F                       | TGATATCTCCCGTATCAGGCCGCAATTTTCTTCCTGGTGGTACCCTG<br>ACCA <b>ATTAACCCTCACTAAAGGGCGG</b>                     | <i>pgaC</i>      |
| Kp-pgaC-del3R                       | AGCCGGGGCAGCACACGGTGTTCGGTTAAGATGAGCGTATTTTCAT<br>TCATTA <b>ATACGACTCACTATAGGGCTC</b>                     | <i>pgaC</i>      |
| Kpdelpga locUP                      | AGATCACCTTATTCAAATACGTTATTGTTTAATCGCAACACGAAAC<br>TCTCA <b>ATTAACCCTCACTAAAGGGCGG</b>                     | <i>pga</i> locus |
| Kpdelpga locDOWN                    | GGTAACGCGTGGCTTTTAAATCAATAATCTGCCCGATTTGATCGT<br>GGTATA <b>ATACGACTCACTATAGGGCTC</b>                      | <i>pga</i> locus |
| Primers for <i>B. subtilis</i>      |                                                                                                           |                  |
| 3971                                | AGGAGGA <b>ATTCTT</b> AAAAAGGATTTGACTTCATGGACA                                                            | <i>epsA</i> up   |
| 3972                                | CTCCT <b>CTCGAG</b> CATATTCTCATTTCATGTATTCATAGC                                                           | <i>epsA</i> up   |
| 3973                                | AGGAG <b>CTCGAG</b> AAACATTTTCGGGGAGTGAAGCGA                                                              | <i>epsA</i> down |
| 3974                                | CTCCT <b>GGATCCA</b> ATAGTGTTCCGATTTTTTTCATTTTCT                                                          | <i>epsA</i> down |
| 3975                                | AGGAGGA <b>ATTCAGA</b> ATTATATGCGATTGTCAGACACA                                                            | <i>epsB</i> up   |
| 3976                                | CTCCT <b>CTCGAG</b> TTTTCTAAAGATCACTCGCTTCACT                                                             | <i>epsB</i> up   |
| 3977                                | AGGAG <b>CTCGAG</b> GAACACTATTCCTACTAGTTTTTTGTA                                                           | <i>epsB</i> down |
| 3978                                | CTCCT <b>GGATCC</b> AGTCCCACCTGAGCCCCGCC                                                                  | <i>epsB</i> down |
| 3979                                | AGGAGGA <b>ATTCAA</b> ATCAGTTGTTGCGGAACAATATC                                                             | <i>epsC</i> up   |
| 3980                                | CTCCT <b>CTCGAG</b> CAGCGCAATAATCATTGACAGTCT                                                              | <i>epsC</i> up   |
| 3981                                | AGGAG <b>CTCGAG</b> GCTGCCAGCGTTCATTAGGGG                                                                 | <i>epsC</i> down |
| 3982                                | CTCCT <b>GGATCCC</b> CTCAAGCACATTCATACCGAGG                                                               | <i>epsC</i> down |
| 1278                                | AGGAG <b>GGATCC</b> GGCGGCCCGGTGACAGTAACA                                                                 | <i>epsD</i> up   |
| 1279                                | CTCCT <b>GTGAC</b> AGTCGCGCAAAACAATATCTTTTTTC                                                             | <i>epsD</i> up   |
| 1280                                | AGGAG <b>GTGAC</b> ATGGATATGGATACAAAGGAGAAAAG                                                             | <i>epsD</i> down |
| 1281                                | CTCCT <b>GAATT</b> CGCGAAGCCACAAATCAATATCTTC                                                              | <i>epsD</i> down |

|      |                                        |           |
|------|----------------------------------------|-----------|
| 1282 | AGGAGGGATCCTTGGCACCGGCATGCTTGTGTTT     | epsF up   |
| 1283 | CTCCTGTCGACATGGAGCACGCGCTTTTGGCTGC     | epsF up   |
| 1284 | AGGAGGTCGACAACATCAGCACGGAAAAGGACCAT    | epsF down |
| 1285 | CTCCTGAATTCCCATGTATTGCTGATGCCGTTAA     | epsF down |
| 2357 | AGGAGGAATTCGTGCGCTTATGATGAAGAGATTTTAT  | epsG up   |
| 2358 | CTCCTCTCGAGCAAATAAATAACAATCCCCATATTGAC | epsG up   |
| 2359 | AGGAGCTCGAGCCGGTCGATTCATCGGTTCTGC      | epsG down |
| 2360 | CTCCTGGATCCACACCGGGTCCGCGCATATCAC      | epsG down |
| 2114 | AGGAGGAATTCCAGACGTACACGCTGTTGTACGA     | epsH up   |
| 2115 | CTCCTCTCGAGATAAACAGCGACTAACAGACTAACC   | epsH up   |
| 2116 | AGGAGCTCGAGGCTGTGTATCAGCGGGTGATCG      | epsH down |
| 2117 | CTCCTGGATCCTTAAGCCATTGATAGCCCTCCATC    | epsH down |
| 3983 | AGGAGGGTACCTCAGAACGTGTCTCGAATCACTG     | epsI up   |
| 3984 | CTCCTCTCGAGCGATTGTAACGACATGTCCTCAC     | epsI up   |
| 3985 | AGGAGCTCGAGAGCGGTGAAGCGCAATGATCCC      | epsI down |
| 3986 | CTCCTAAGCTTGCTTGATGAGAAAAGTGAGCCGC     | epsI down |
| 1286 | AGGAGGGATCCCGCAGAACCGGAAGGGGTTTATA     | epsJ up   |
| 1287 | CTCCTGTCGACCGGGACAATAATGCTGACGAGCG     | epsJ up   |
| 1288 | AGGAGGTCGACCGGGACAATGAAAGGCAGTGCGAA    | epsJ down |
| 1289 | CTCCTGAATTCCTGAATGGAAGTGGTGATATAAAG    | epsJ down |
| 4068 | AGGAGGGTACCTAAACATGCTCACGAAACGAGATT    | epsK up   |
| 4069 | CTCCTCTCGAGTATCGTGAATTCATGCCTGCTTC     | epsK up   |
| 4070 | AGGAGCTCGAGACGGGAGTGACAGTCAGCTTTTG     | epsK down |
| 4071 | CTCCTAAGCTTACCAGTTGTCAACGTACCAAACAT    | epsK down |
| 2361 | AGGAGGAATTCAAATGCTTATACGGGTGCTGTCTG    | epsL up   |
| 2362 | CTCCTCTCGAGCAAAAAAATGGCGGCCGTCAGATC    | epsL up   |
| 2363 | AGGAGCTCGAGCATGTGACCGCGGAACGGTTTAC     | epsL down |
| 2364 | CTCCTGGATCCCATATAGAATCGGATTGGCGGTTG    | epsL down |
| 1487 | AGGAGGAATTCTACGTATCCCGCATTACAGGCTAC    | epsM up   |
| 1488 | CTCCTCTCGAGTATCAGCTCTCTGATCACCTTTCC    | epsM up   |
| 1489 | AGGAGCTCGAGGTGCTCCGGCACGCATCATTTCT     | epsM down |
| 1490 | CTCTGGATCCCCGTTATCAAGTGTGAGCGTGGT      | epsM down |
| 1491 | AGGAGGAATTCGAATGTCCTGAAGGGCGATCTG      | epsN up   |
| 1492 | CTCCTCTCGAGCTCCCTGCCGCTCATATGAGG       | epsN up   |
| 1493 | AGGAGCTCGAGGTCATTGAAGTGCTACTGCACTTA    | epsN down |
| 1494 | CTCCTGGATCCCTTCCGCTCACATGTGAGCAGGA     | epsN down |
| 3991 | AGGAGGAATTCTGAAATCGTAAGCCTGTGTGATGC    | epsO up   |
| 3992 | CTCCTCTCGAGTTTCTGTTTCAGGCTGATCATCGA    | epsO up   |
| 3993 | AGGAGCTCGAGCTCATCCAGCACGCCTCAAAGAA     | epsO down |
| 3994 | CTCCTGGATCCGGCCGATACAGATAATCGCCGT      | epsO down |

Cassette **Boldface** characters indicate restriction sites

primers:

Complementa  
tion

Ecoli-pgaA-  
compF TTTTTTCTAGACGGATTATGAGGTGCAAAAATATCTTTCTTTTCAGTTACC

Ecoli-pgaA-  
compR TTTTTCTGCAGGAGTGAGCATAATTATACTCACCAGCATCAGG

Ecoli-pgaB- TTTTTTCTAGATTATGACGGTGACAGAGAACAACACTTATACG

compF  
Ecoli-pgaB-  
compR TTTTTCCTGCAGGTACGCATAGGGGGATGCATAACACC

Ecoli-pgaC-  
compF TTTTTGAGCTCAGTGAAAACTATGGTTATTATCCCGACAATTTTCTGC

Ecoli-pgaC-  
compR TTTTTTCTAGATTCTGGCCTCGCTTTGCCAGTAATAACCC

Ecoli-pgaD-  
compF TTTTTTCTAGATGTTGATGCCTAAAAAGCAACGCGC

Ecoli-pgaD-  
compR TTTTTCCTGCAGGCGGGCGAACC GGGCTTTGTTTTG

Bsub-epsH-  
compF TTTTTTCTAGAATGCCGGTCGATTCATCGGTTCTG

Bsub-epsH-  
compR TTTTTCCTGCAGGTTTAGCAGCAGCCATTCTGCAAAATTGATTTTCAACG

Bsub-epsI-  
compF TTTTTTCTAGAGCGAAATACAGAATGATTCCGTTTCGTCGC

Bsub-epsI-  
compR TTTTTCCTGCAGGTACATCGGGACAATAATGCTGACGAGCG

Bsub-epsJ-  
compF TTTTTTCTAGAAAAAGAAACATCCCGTGCAGGCTTTCCG

Bsub-epsJ-  
compR TTTTTCCTGCAGGAAGCCGTGAGATTCGCGCTG

Bsub-epsK-  
compF TTTTTTCTAGATTAGCACTGTGTAAATGGCGGCTCAC

Bsub-epsK-  
compR TTTTTCCTGCAGGCCGGCCTTACTTGCTTAAAGAAGA
